# Supplementary material for: Reevaluation des Notarzteinsatzindikationskataloges nach Verkehrsunfällen
Source: Springer Nature journal article supplement (doi:10.1007/s00113-023-01408-8), 2024-02-02
Supplement: MOESM1 [file 26692828]

| Rekord                               | Variable            | Bedeutung                                                           | Geeignet für Abfrage |
|--------------------------------------|---------------------|---------------------------------------------------------------------|----------------------|
| <b>Allgemeine Daten des Unfalles</b> | TZEIT               | Tageszeit                                                           | ja                   |
|                                      | ORTSL               | Unfallstelle innerhalb oder außerhalb einer geschlossenen Ortschaft | ja                   |
|                                      | ANZBET              | Anzahl Beteiligter                                                  |                      |
|                                      | ANZBETFZ            | Anzahl beteiligte Fahrzeuge                                         | ja                   |
|                                      | ANZPERS             | Anzahl beteiligte Personen                                          | ja                   |
|                                      | ANZVERL             | Anzahl verletzte Personen                                           | ja                   |
|                                      | HURSAB              | Unfallverursacher amtlich                                           |                      |
|                                      | HURSAU              | Haupt-Unfallursacher amtlich                                        |                      |
|                                      | FOLGE1 / 2          | Folgeunfall                                                         |                      |
|                                      | UTYP                | Unfalltyp                                                           |                      |
|                                      | UART                | Unfallart                                                           |                      |
|                                      | TEMP                | Temperatur                                                          |                      |
|                                      | WINDV / WINDS       | Windverhalten                                                       |                      |
|                                      | WOLK                | Bewölkung/Nebel                                                     | ja                   |
|                                      | NIED                | Niederschlag                                                        | ja                   |
|                                      | UMGEB               | Umgebung                                                            | ja                   |
|                                      | STFUHO              | Unfallstelle im Straßennetz                                         |                      |
|                                      | TUNNEL              | Tunnel                                                              | ja                   |
|                                      | VKREG               | Verkehrsregelung                                                    |                      |
|                                      | VSTUFE              | Verkehrsstufe                                                       |                      |
| <b>Unfallfahrzeug</b>                | FART                | Fahrzeugart                                                         | ja                   |
|                                      | FZGB                | Sichtbare Deformation am Fahrzeug                                   | ja                   |
|                                      | ANZINS              | Anzahl der Insassen                                                 | ja                   |
|                                      | FZART               | Fahrzeugart (Aufbau)                                                | ja                   |
|                                      | ABF                 | Aufbauform                                                          | ja                   |
|                                      | FZGLASS             | Fahrzeugklasse                                                      | ja                   |
|                                      | KLASSECE            | Fahrzeugklasse amtlich (gelabelt)                                   |                      |
|                                      | LSTG                | Leistung in kw                                                      |                      |
|                                      | LAENGE              | Länge                                                               |                      |
|                                      | BREITE              | Breite                                                              |                      |
|                                      | HOEHE               | Höhe                                                                |                      |
|                                      | LGEW                | Leergewicht                                                         |                      |
|                                      | GEWGES              | Crashgewicht                                                        |                      |
|                                      | BSPUR               | Bremsspur vor Kollision                                             |                      |
|                                      | SSPUR               | Drift- oder Schleuderspurzeichnung vor Kollision                    |                      |
|                                      | BENZAUS             | Kraftstoff ausgelaufen                                              |                      |
|                                      | OELAUS              | Öl ausgelaufen                                                      |                      |
|                                      | FLAUS1-3            | Flüssigkeit ausgelaufen                                             |                      |
|                                      | BRANDURS            | Ursprung des Feuers?                                                |                      |
|                                      | ENDLAGE             | Endlage des Fahrzeuges (auf, neben, ..., der Fahrbahn)              | ja                   |
| ANHAENGER                            | Anhänger mitgeführt | ja                                                                  |                      |
| <b>Personendaten</b>                 | GESCHL              | Geschlecht                                                          | ja                   |
|                                      | GROESP / GROESPG    | Körpergröße                                                         | evtl. clustern       |
|                                      | GEWP / GEWPG        | Gewicht                                                             | evtl. clustern       |
|                                      | ALTER1 / ALTERG     | Alter                                                               | evtl. clustern       |
|                                      | KISITZ              | Kindersitz                                                          | ja                   |
| UNVERMOG                             | Unvermögen          |                                                                     |                      |

|                                                                                  |                         |                                           |                |
|----------------------------------------------------------------------------------|-------------------------|-------------------------------------------|----------------|
| <b>Verletzungsübersicht</b>                                                      | AMNES                   | Amnesie                                   | evtl.          |
|                                                                                  | PUPILLE                 | abnorme Pupillen                          |                |
| <b>Einzelverletzung</b>                                                          | VTEIL1 / 2              | Anprallstelle                             |                |
|                                                                                  | AIS15REG                | AIS-Schweregrad                           |                |
| <b>Rettungskette</b><br>(nur präklinisch)                                        | BEWPERS                 | Bewusstseinslage Unfallort                | ja             |
|                                                                                  | BERGM                   | Rettungs-/Bergungsmaßnahmen               | evtl.          |
|                                                                                  | TBERG1 - 3              | techn. Rettung/Bergung                    | evtl.          |
|                                                                                  | ERSTH                   | Erste Hilfe geleistet                     | ja             |
|                                                                                  | NOTVER                  | Maßnahmen zur Blutstillung (Ersthelfer)   | ja             |
|                                                                                  | AWFREI                  | Atemwege befreien (Ersthelfer)            | ja             |
|                                                                                  | ATEMSP                  | Atemspende (Ersthelfer)                   | ja             |
|                                                                                  | HERZMA                  | Herzmassage (Ersthelfer)                  | ja             |
|                                                                                  | PATEIN                  | Lage Patient bei Eintreffen der Sanitäter | ja             |
|                                                                                  | GCS1 - 3 / GCSG         | GCS                                       |                |
|                                                                                  | UDRUCKV                 | Maßnahmen zur Blutstillung (Unfallort)    |                |
|                                                                                  | UBEATM                  | Beatmung am Unfallort                     |                |
|                                                                                  | UINTUB                  | Intubation am Unfallort                   |                |
|                                                                                  | UREA                    | Reanimation am Unfallort                  |                |
| <b>Insassenbewegung</b>                                                          | EINGEKL                 | Insasse eingeklemmt                       | ja             |
|                                                                                  | AUSSCHL                 | Insasse herausgeschleudert                | ja             |
| <b>PKW allgemein</b>                                                             | (LONGCM)                | Deformation Längsträger (in cm)           |                |
|                                                                                  | (FLTCM)                 | Deformation über Längsträger hinaus (cm)  |                |
| <b>PKW Beschädigungen von außen</b><br>(eigener PKW und / oder Kollisionsgegner) | FZGFB                   | Fzg-Front beschädigt                      | ja             |
|                                                                                  | FZGSLB                  | Seite links beschädigt                    | ja             |
|                                                                                  | FZGSRB                  | Seite rechts beschädigt                   | ja             |
|                                                                                  | FZGHB                   | Fzg-Heck beschädigt                       | ja             |
|                                                                                  | (FELGVL / HL / VR / HR) | Felge beschädigt                          | ja             |
|                                                                                  | (ACHSVL / HL / VR / HR) | Achse beschädigt                          |                |
| <b>LKW allgemein</b>                                                             | USCHUTZ                 | Unterfahrschutz                           |                |
| <b>LKW Beschädigungen von außen</b><br>(Kollisionsgegner)                        | LFZGFB                  | Fzg-Front beschädigt                      | ja             |
|                                                                                  | LFZGSLB                 | Seite links beschädigt                    | ja             |
|                                                                                  | LFZGSRB                 | Seite rechts beschädigt                   | ja             |
|                                                                                  | LFZGHB                  | Fzg-Heck beschädigt                       | ja             |
| <b>Zweirad allgemein</b>                                                         | -                       |                                           |                |
| <b>Fahrzeuginnenraum</b>                                                         | -                       |                                           |                |
| <b>Technische Daten des Anhängers</b>                                            | -                       |                                           |                |
| <b>Fahrzeugbild außen</b><br>(eigener PKW und / oder Kollisionsgegner)           | ZRISS                   | Fahrzeug zerrissen                        | ja             |
|                                                                                  | MAXDEFB                 | Maximale Deformation (in cm)              | evtl. clustern |
|                                                                                  | FSBRUCH1 / 2            | 1. Beschädigung Frontscheibe              | ja             |
|                                                                                  | HSBRUCH1 / 2            | 1. Beschädigung Heckscheibe               | ja             |
|                                                                                  | LONGDEF                 | Deformation Längsträger                   |                |
|                                                                                  | TUERZVL                 | Zustand Tür vorn links                    |                |
|                                                                                  | TVLINTR                 | Intrusion Tür vorn links                  | ja             |
|                                                                                  | TUERZVR                 | Zustand Tür vorn rechts                   |                |
|                                                                                  | TVRINTR                 | Intrusion Tür vorn rechts                 | ja             |
|                                                                                  | TUERZHL                 | Zustand Tür hinten links                  |                |
|                                                                                  | THLINTR                 | Intrusion Tür hinten links                | ja             |
|                                                                                  | TUERZHR                 | Zustand Tür hinten rechts                 |                |

|                                                    |                                                |                                                                                                                              |                |
|----------------------------------------------------|------------------------------------------------|------------------------------------------------------------------------------------------------------------------------------|----------------|
|                                                    | THRINTR                                        | Intrusion Tür hinten rechts                                                                                                  | ja             |
| <b>Fahrzeugbild innen</b>                          | DEFIN                                          | Innenraum verändert                                                                                                          |                |
| <b>Daten der Befragung eines Unfallbeteiligten</b> | -                                              |                                                                                                                              |                |
| <b>Fußgänger</b>                                   | VERHFUSSG                                      | Verhalten Fußg. vorm Anprall                                                                                                 |                |
|                                                    | FGVKOL                                         | Geschwindigkeit Fußgänger bei Kollision                                                                                      |                |
|                                                    | UQFB                                           | Überqueren der Fahrbahn                                                                                                      |                |
|                                                    | UQFB2                                          | Überqueren der Fahrbahn zwischen                                                                                             |                |
|                                                    | SPORT                                          | benutztes Mobilitätsmittel                                                                                                   | ja             |
|                                                    | FGUART                                         | Art der Fußgänger-Kollision                                                                                                  |                |
|                                                    | FGKIN                                          | Fußgängerkinematik                                                                                                           |                |
|                                                    | FGRI                                           | Richtung Fußgänger zu Fahrzeug                                                                                               |                |
|                                                    | FGANST                                         | Anstoßstelle am Fußgänger                                                                                                    |                |
|                                                    | FGUBER                                         | Überrollen / Überfahren des Fußgängers                                                                                       | ja             |
|                                                    | WWEITFG                                        | Wurfweite Fußgänger (in cm)                                                                                                  | evtl. clustern |
| <b>Zweiradaufsasse</b>                             | KINGRP                                         | Bewegungsablauf des Zweiradaufsassen (nicht des Zweirads!) während der Kollisionsphase                                       |                |
|                                                    | AUSGRP                                         | Mit der Auslaufgruppe wird der Bewegungsablauf des Zweiradaufsassen nach der Kollisionsphase der Primärkollision beschrieben |                |
|                                                    | LKOMBI1 / 2                                    | Kombi ein-/zweiteilig                                                                                                        | ja             |
|                                                    | LSTIEF                                         | Stiefel                                                                                                                      | ja             |
|                                                    | WWZWF                                          | Wurfweite Zweiradaufsasse (in cm)                                                                                            | evtl. clustern |
|                                                    | PROT S / OA / E / UA / H / R / T / OS / K / US | Protector                                                                                                                    | ja             |
|                                                    | ZWHELM                                         | Helmart                                                                                                                      |                |
|                                                    | HVERL                                          | Helmverlust                                                                                                                  | ja             |
|                                                    | KINNR / KINNRH                                 | Kinnriemen                                                                                                                   |                |
|                                                    | VISIERZ                                        | Zustand von Visier, Brille                                                                                                   | ja             |
| <b>Rekonstruktionsdaten</b>                        | KONOBJ                                         | Kollisionskontrahent - Objekt                                                                                                | ja             |
| (eigener PKW und / oder Kollisionsgegner)          | VO                                             | Ausgangsgeschwindigkeit                                                                                                      |                |
|                                                    | EPSILON                                        | Stoßfaktor                                                                                                                   |                |
|                                                    | VK                                             | Geschw. Sequenzende / Koll.geschwindigkeit                                                                                   |                |
|                                                    | BV                                             | Mittlere Bremsverzögerung im Vorgang                                                                                         |                |
|                                                    | DWINK                                          | Ablenkungswinkel (°)                                                                                                         |                |
|                                                    | KWINK                                          | Kollisionswinkel (°)                                                                                                         |                |
|                                                    | IMP                                            | Impulswinkel                                                                                                                 |                |
|                                                    | EES                                            | Energy Equivalent Speed                                                                                                      |                |
|                                                    | DV                                             | Delta-v (in km/h)                                                                                                            |                |
|                                                    | VREL                                           | Relativgeschwindigkeit                                                                                                       |                |
|                                                    | DECK / SCHDECK                                 | Überdeckungsgrad (in %)                                                                                                      |                |
|                                                    | ABKOM                                          | Abkommen von Fahrbahn                                                                                                        | ja             |
|                                                    | (VDI1-7)                                       | prinzipielle Richtung der Kraft, die den vorliegenden Schaden an dem Fahrzeug verursacht hat                                 |                |
|                                                    | PCCDC                                          | Insassenzelle deformiert                                                                                                     | ja             |
|                                                    | UFAHR + ARTUFAHR                               | Unterfahren                                                                                                                  | ja             |
|                                                    | UFAHRCM                                        | Unterfahren, Länge (in cm)                                                                                                   | evtl. clustern |
|                                                    | PLANKEK                                        | Kollisionsart mit Schutzplanke                                                                                               | ja             |
| <b>Sitzdaten</b>                                   | RHSBEN                                         | Gurt benutzt                                                                                                                 | ja             |
|                                                    | AIRBF / SI / TI / DI / KN                      | Airbag Auslösung                                                                                                             | ja             |
| <b>Verkehrsunfallanzeige</b>                       | -                                              |                                                                                                                              |                |

|                                             |          |                                              |    |
|---------------------------------------------|----------|----------------------------------------------|----|
| <b>Mitfahrer laut VU Anzeige</b>            | -        |                                              |    |
| <b>Beteiligte laut VU Anzeige</b>           | -        |                                              |    |
| <b>Fahrzeugausstattung</b>                  | AIRBVRUA | Aktivierung des Fußgänger-/Radfahrer-Airbags | ja |
| (eigener PKW und / oder Kollisionsgegner)   | POPVRUA  | Aktivierung der Pop-up-Haube                 | ja |
|                                             | BREMSASS | Bremsassistent                               |    |
|                                             | AEBLANG  | AEB/Notbremssystem Längsverkehr              |    |
|                                             | AEBQUER  | AEB/Notbremssystem Querverkehr               |    |
|                                             | AEBFGRF  | AEB/Notbremssystem Fußgänger/Radfahrer       |    |
|                                             | PRECRASH | Vorkonditionierung von Sicherheitssystemen   |    |
| <b>Daten des Unfallbeteiligten</b>          | ARTTEIL  | Art der Verkehrsteilnahme                    | ja |
| <b>Daten der befahrenen Straße</b>          | RICHT    | Richtung vor Unfall                          | ja |
|                                             | STRDECK  | Straßendecke                                 |    |
|                                             | STROB    | Straßenoberfläche                            | ja |
|                                             | FSTREIF  | Fahrzeug befuhr                              |    |
|                                             | UEBERHOL | Überholen                                    |    |
|                                             | RICHTVU  | Fahrlinie vor Unfall                         |    |
|                                             | RICHTUE  | Straßenführung bei Unfall                    |    |
|                                             | FSPUR    | Anzahl Fahrstreifen                          | ja |
|                                             | FSPURG   | Anzahl Fahrstreifen in Gegenrichtung         | ja |
|                                             | BAUST    | Baumaßnahmen                                 | ja |
|                                             | AQUAPL   | Aquaplaning-Einfluss                         |    |
|                                             | VZUL     | zulässige Höchstgeschwindigkeit              | ja |
|                                             | UVERBOT  | Überholverbot                                | ja |
| <b>Allgemeine Daten der Rekonstruktion</b>  | ANZKOLL  | Anzahl der Kollisionen                       |    |
|                                             | ROLLWANN | Überschlag                                   | ja |
|                                             | SCHLEU   | Instabiler Fahrzustand vor Unfall            |    |
|                                             | SCHLEU2  | Fahrzustand bei Unfalleinleitung             |    |
| <b>Einzelanpralldaten</b>                   | ANTEIL   | Anprallstelle am Fahrzeug                    |    |
|                                             | ANART    | Anprallart                                   |    |
|                                             | ANKT     | Angepralltes Körperteil                      |    |
| <b>Fahrrad allgemein</b>                    | -        |                                              |    |
| <b>Fahrrad Beschädigungen</b>               | FRBESCH  | Fahrrad beschädigt                           | ja |
|                                             | FRROLL   | Fahrrad überrollt                            |    |
|                                             | FRRAHMEN | Rahmenbeschädigung                           | ja |
|                                             | FRFELGV  | Felge vorn                                   | ja |
|                                             | FRFELGH  | Felge hinten                                 | ja |
| <b>Motorisiertes Zweirad allgemein</b>      | -        |                                              |    |
| <b>Motorisiertes Zweirad Beschädigungen</b> | MZBESCH  | motor. Zweirad beschädigt                    | ja |
|                                             | MZROLL   | motor. Zweirad überrollt                     |    |
|                                             | MZFELGV  | Felge vorn                                   | ja |
|                                             | MZFELGH  | Felge hinten                                 | ja |
|                                             | MZRAHMEN | Rahmenbeschädigung                           | ja |
| <b>Kinder-Rückhaltesystem</b>               | -        |                                              |    |
| <b>Reifendaten</b>                          | -        |                                              |    |
| <b>PKW Innenraum</b>                        | IDAMAGE  | Beschädigungen innen                         |    |
| (seit 2017 + kaum durch Laie erhebbar)      | IMIRROR  | Innenspiegel                                 |    |
|                                             | IAPILLTL | A-Säule oben links inkl. Verkleidung         |    |
|                                             | ISTWHEEL | Lenkrad, Lenkradkranz                        |    |
|                                             | ISTWHSPK | Lenkrad, Speichen inkl. Bedienelemente       |    |

|                                           |           |                                       |    |
|-------------------------------------------|-----------|---------------------------------------|----|
|                                           | IPEDALTHR | Pedalerie, Gaspedal                   |    |
|                                           | IPEDALBRK | Pedalerie, Bremspedal                 |    |
|                                           | IPEDALCL  | Pedalerie, Kupplungspedal             |    |
|                                           | IAPILLTR  | A-Säule oben rechts inkl. Verkleidung |    |
|                                           | IBPILLTL  | B-Säule oben links inkl. Verkleidung  |    |
|                                           | ICPILLTL  | C-Säule oben links inkl. Verkleidung  |    |
|                                           | IDPILLTL  | D-Säule oben links inkl. Verkleidung  |    |
|                                           | IBPILLTR  | B-Säule oben rechts inkl. Verkleidung |    |
|                                           | ICPILLTR  | C-Säule oben rechts inkl. Verkleidung |    |
|                                           | IDPILLTR  | D-Säule oben rechts inkl. Verkleidung |    |
| <b>LKW Innenraum</b>                      | ITDAMAGE  | Beschädigungen innen                  |    |
| <b>Bus allgemein</b>                      | BUSCHUTZ  | Unterfahrschutz                       |    |
| <b>Schienefahrzeug allgemein</b>          | -         |                                       |    |
| <b>Andere Nutzfahrzeuge<br/>allgemein</b> | NUSCHUTZ  | Unterfahrschutz                       |    |
| (bei Kollisionsgegner)                    | NFZGFB    | Fzg-Front beschädigt                  | ja |
|                                           | NFZGLB    | Seite links beschädigt                | ja |
|                                           | NFZGSRB   | Seite rechts beschädigt               | ja |
|                                           | NFZGHB    | Fzg-Heck beschädigt                   | ja |
| <b>Bus Beschädigungen außen</b>           | BFZGFB    | Fzg-Front beschädigt                  | ja |
| (bei Kollisionsgegner)                    | BFZGLB    | Seite links beschädigt                | ja |
|                                           | BFZGSRB   | Seite rechts beschädigt               | ja |
|                                           | BFZGHB    | Fzg-Heck beschädigt                   | ja |
| <b>ElektroKleinstfahrzeug</b>             | ESCHADV   | Beschädigungen vorn                   | ja |
|                                           | ESCHADH   | Beschädigungen hinten                 | ja |
|                                           | ESCHADR   | Beschädigungen rechts                 | ja |
|                                           | ESCHADL   | Beschädigungen links                  | ja |
|                                           |           |                                       |    |
